1        **Understanding depression in female adolescents: Correlations between**  
2        **interpersonal trust, self-esteem, and interpersonal attributional style**

3

4    Lin Li<sup>1</sup>, Lan Tang<sup>2</sup>, Yan-hong Lai<sup>1</sup>, Jian Liu<sup>1\*</sup>

5

6    <sup>1</sup> Mental Health Center and Hangzhou Seventh People's Hospital, Zhejiang University School  
7    of Medicine, Tianmushan Road No.305, Xihu district, Hangzhou city, Zhejiang province  
8    310000, China

9    <sup>2</sup> School of Mental Health and Psychological Sciences, Anhui Medical University, Meishan  
10   Road No.81, Shushan district, Hefei city, Anhui province 230032, China

11

12    \*Corresponding author

13    Email: [lj7037@126.com](mailto:lj7037@126.com) (JL)

## 14 **Abstract**

15           This study examines sociocognitive factors causing depressed mood in hospitalized  
16 female adolescents with depression and the correlations between interpersonal trust, self-  
17 esteem, and interpersonal attributional style. From June 2021 to October 2022, a total of 166  
18 hospitalized female adolescents with depression who met the inclusion criteria were recruited  
19 from Hangzhou Seventh People’s Hospital. They provided demographic information and were  
20 evaluated for depressed mood, interpersonal trust, self-esteem, and interpersonal attributional  
21 style using the Chinese versions of the Children’s Depression Inventory, Interpersonal Trust  
22 Scale, Rosenberg Self-Esteem Scale, and Multidimensional–Multiattributional Causality Scale,  
23 respectively. Interpersonal trust and self-esteem were negatively correlated with depressed  
24 mood, whereas internal and external attributions of interpersonal attributional style were  
25 significantly and positively correlated with depressed mood. Interpersonal trust was  
26 significantly and positively correlated with self-esteem, and interpersonal trust and self-esteem  
27 were negatively correlated with interpersonal attributional style. An analysis of the theoretical  
28 model for interpersonal trust–self-esteem– interpersonal attributional style–depressed mood  
29 relationships revealed that the model had a good fit and the overall fit indicators met the  
30 statistical requirements. The results of the path coefficient analysis indicated that all path  
31 coefficients reached statistically significant levels, except for those from interpersonal trust to  
32 depressed mood. Therefore, self-esteem mediates the effects of interpersonal trust and  
33 interpersonal attributional style on depression and is a critical sociocognitive factor affecting  
34 female adolescents with depression. Accordingly, psychological interventions for female  
35 adolescents with depression should focus on improving self-esteem.

## 36 **Introduction**

37           Depression is a leading cause of adolescent illnesses and disabilities. International  
38 epidemiological studies report that the prevalence of adolescent depression is 1.8–7.8%, with  
39 a lifetime prevalence close to that of adults and a recurrence rate as high as 40–70% [1-3]. The  
40 latest epidemiological data from China indicate that the time-point prevalence of depressive  
41 disorder in children and adolescents aged 6–16 years is 3.0%, of which severe depression  
42 accounts for 2.0% [4]. Depressed mood is even more common. According to a recent report,  
43 the detection rate of various levels of depressive symptoms in adolescents has reached 24.6%;  
44 the risks of mild and severe depression are 17.2% and 7.4%, respectively. Notably, the  
45 detection rate of depressive symptoms in females is twice that in males [5]. This is why the  
46 present study focuses on female adolescents with depression (FADs). The onset of depression  
47 negatively affects adolescents' social functioning and academic achievement and increases  
48 their risk of smoking, substance abuse, obesity, self-injury, and suicide [6]. In view of the high  
49 detection rates and negative impacts of depressive symptoms, the World Health Organization  
50 indicated that the primary disease burden in people aged 10–24 is major depressive disorder  
51 [7].

52           Interpersonal relationships are an important factor in adolescent depression [8,9].  
53 According to evolutionary psychology, depression is an individual's response to interpersonal  
54 pressure. When individuals fail to integrate into groups to meet their need for belongingness,  
55 they tend to exhibit signs of depression [10]. This view is unanimously supported by Chinese  
56 and international studies [11]. A Chinese report also indicated that the level of depression in  
57 adolescents increases proportionately with being unpopular among classmates, bullied, and

58 criticized by teachers [5]. Conversely, protective factors against adolescent depression include  
59 high-quality peer relationships, positive parental educational methods, and positive teacher–  
60 student relationships [12,13]. Female adolescents are more likely to be affected by the quality  
61 of interpersonal relationships than male adolescents, because they focus more on the level of  
62 intimacy and loyalty in interpersonal relationships and are more likely to experience depressive  
63 reactions when such relationships break down [14].

64 Interpersonal relationships are affected by many sociocognitive factors, one of which  
65 is interpersonal trust (IT), an important topic in sociopsychological research. IT is a generalized  
66 psychological expectation established by individuals while interacting with others to determine  
67 whether their words and commitments (written or verbal) are honest and reliable [15]. Mutual  
68 trust is developed in the process of interpersonal communication and is based on the other  
69 party’s abilities and ethical standards [16]. As a link connecting individuals to other people and  
70 social development in general, IT is key to building harmonious relationships and social capital.  
71 It facilitates socioeconomic functioning, improves the operational efficiency of social  
72 organizations, and promotes economic growth [17].

73 Various studies have examined the relationship between IT and mental health in  
74 adolescents. IT has been reported to be critical to mental health development and an important  
75 facilitating force in forming and maintaining healthy interpersonal relationships [18,19].  
76 Adolescents with high IT levels can better expand their social networks, thereby allowing them  
77 to gain higher social status, reduce loneliness, and establish high-quality peer relationships [20].  
78 By contrast, the critical communication style that adolescents with depression adopt during  
79 their peer interactions generates negative emotions, which further exacerbates their feelings of

80 rejection and isolation [21]. However, other researchers have suggested that IT does not predict  
81 the emergence of depression [22]. Some studies with Asian populations also found no  
82 correlation between IT and mental health issues [23]. Therefore, the impact of IT on depressed  
83 mood merits further investigation.

84         Self-esteem is another sociocognitive factor that affects interpersonal relationships. It  
85 is an overall evaluation of oneself and the positive attitude and high regard one has for all  
86 aspects of oneself [24]. The relationship between self-esteem and depressed mood has received  
87 extensive research attention. The susceptibility model of depression proposes that negative  
88 self-perception is a precursor to the development of depression in individuals and can predict  
89 its emergence [25]. This explanation is supported by several empirical studies, particularly  
90 those on late adolescents and adults. These studies consistently found that adolescents with low  
91 self-esteem were at a greater risk of and more likely to experience depression [26].

92         According to Erickson, the main task in adolescence is to develop one's self-identity  
93 [14]. Hence, a consistent self-concept is crucial, as it determines whether individuals can  
94 transition to adulthood healthily and smoothly [14]. Adolescents acquire consistent information  
95 about themselves through diverse interpersonal interactions. The more affirmed they feel, the  
96 more positive their self-perception and the higher their self-esteem, which in turn affects the  
97 quality of their interpersonal relationships and the stability of their social support systems.  
98 When individuals enter adolescence, their focus transitions from their parents to peer groups  
99 to gain positive experiences. In this process, their self-esteem gains new dimensions for self-  
100 evaluation, namely, close friendships and attraction to those of the opposite gender [14].

101 Interpersonal attributional style (IAS), which similarly affects the establishment and  
102 maintenance of interpersonal relationships, is a cognitive process through which people draw  
103 conclusions about factors that influence or explain the consequences of their actions [24].  
104 Various mental health effects arise from different attributional methods. The hopelessness  
105 theory of depression posits that certain features of people's attributional methods are among  
106 the factors contributing to their depressed mood [27]. Specifically, individuals who tend to  
107 attribute bad events to themselves and view them as having long-lasting and comprehensive  
108 effects but attribute good events to others and view them as having temporary and localized  
109 effects are more likely to develop depressive symptoms [27]. This theoretical model has been  
110 supported by adequate evidence for the past 30 years. Initially intended for studying adult  
111 depression, some researchers have applied it to children and adolescents and verified that their  
112 negative attributional styles are related to depression [28].

113 The correlations between depression and the three important sociocognitive factors of  
114 IT, self-esteem, and IAS have been discussed to a certain extent. However, few studies have  
115 comprehensively examined the interactions among these three factors, which, in turn, affect  
116 the genesis or persistence of depression. Some studies have examined the impact of IT and  
117 self-esteem on mental health, while others have studied the impacts of self-esteem and  
118 attributional style instead. These studies concluded that self-esteem plays a mediating or  
119 moderating role in the relationship between depression and IT or attributional style [29-31].  
120 Considering that IT, self-esteem, and IAS are important sociocognitive factors that contribute  
121 to stable interpersonal relationships and help adolescents obtain social support and maintain

122 physical and mental health, we propose that examining the interactions between these factors  
123 can help clinicians better understand their role in predicting depressive symptoms.

124 Chinese and international studies have rarely sampled inpatient adolescents with  
125 depression to understand the mode by which IT, self-esteem, and IAS affect their depression.  
126 FADs are different from normal adolescents in terms of the causes and severity of depressed  
127 mood, resulting in more severely impaired social function, which has a greater negative social  
128 impact and leads to a higher disease burden. Relevant research findings can help patients,  
129 family members, teachers, and clinicians better understand the key sociocognitive factors  
130 affecting FADS; this can help identify the key points for intervention, improve the  
131 effectiveness of existing interventions, more effectively promote the recovery of social  
132 functions, and reduce the possibility of relapse, thereby reducing the societal disease burden.  
133 Therefore, hospitalized FADs were recruited to examine the mode by which IT, self-esteem,  
134 and IAS affect depression.

## 135 **Methods**

### 136 **Participants**

137 All data were acquired from a project titled “Effects of interpersonal psychotherapy on  
138 the sociocognitive functions of adolescents with depression.” The research team recruited  
139 eligible FADs from hospitalized patients between June 2021 and October 2022. The inclusion  
140 criteria were (i) aged 12–18; (ii) diagnosed with depression according to the International  
141 Classification of Diseases 10th Revision diagnostic criteria and remained so upon discharge;  
142 (iii) relatively intact cognitive functions and capable of participating in a 1.5-hour-long  
143 interview and evaluation; (iv) no major physical disease, traumatic brain injury, or other organ

144 damage; (v) no history of drug abuse or substance dependence; and (v) no concomitant  
145 diagnosis of other mental disorders.

146 There were 166 Han Chinese FADs, with an average age of 15.08±1.52 years. The  
147 general demographic data are presented in Table 1.

148

149 **Table 1 General Demographic Data (N=166).**

|                                   | Number           | %    |
|-----------------------------------|------------------|------|
| <i>Age</i>                        | 15.08±1.52 years |      |
| <i>Grade of study</i>             | 9.03±1.65        |      |
| <i>Place of residence</i>         |                  |      |
| City                              | 59               | 35.5 |
| Town                              | 71               | 42.8 |
| Village                           | 36               | 21.7 |
| <i>Only child</i>                 |                  |      |
| Yes                               | 59               | 35.5 |
| No                                | 107              | 64.5 |
| <i>Father's occupation</i>        |                  |      |
| Public official                   | 13               | 7.8  |
| Company employee                  | 26               | 15.7 |
| Worker                            | 57               | 34.3 |
| Freelancer                        | 37               | 22.3 |
| Other                             | 33               | 19.9 |
| <i>Father's educational level</i> |                  |      |
| Junior high school or below       | 90               | 54.2 |



|                                      |                    |      |
|--------------------------------------|--------------------|------|
| High/vocational school               | 40                 | 24.1 |
| College or above                     | 36                 | 21.7 |
| <i>Mother's occupation</i>           |                    |      |
| Public official                      | 17                 | 10.2 |
| Company employee                     | 24                 | 14.5 |
| Worker                               | 43                 | 25.9 |
| Freelancer                           | 42                 | 25.3 |
| Other                                | 40                 | 24.1 |
| <i>Mother's educational level</i>    |                    |      |
| Junior high school or below          | 98                 | 59.0 |
| High/vocational school               | 38                 | 22.9 |
| College or above                     | 3                  | 18.1 |
| <i>Annual household income (RMB)</i> |                    |      |
| <100,000                             | 62                 | 37.3 |
| 100,000–300,000                      | 71                 | 42.8 |
| >300,000                             | 33                 | 19.9 |
| <i>Academic performance</i>          |                    |      |
| Top 5                                | 6                  | 3.6  |
| Above average                        | 44                 | 26.5 |
| Average                              | 53                 | 31.9 |
| Below average                        | 55                 | 33.1 |
| Bottom 5                             | 8                  | 4.8  |
| <i>Duration of disease</i>           | 20.62±18.28 months |      |
| <i>Number of hospitalizations</i>    | 1.86±1.47 times    |      |

## 151 **Evaluation indicators**

### 152 **Depressed mood**

153           The Children’s Depression Inventory, compiled by Kovacs et al., is suitable for use  
154 with children aged 7–17 [32]. The questionnaire contains 27 items, each with three options  
155 describing the severity of depressive symptoms. The options are scored from 0 (least severe)  
156 to 2 (most severe) points. The total score is 54 points; the higher the score, the more severe the  
157 depression. The Chinese version of the scale has good reliability and validity among  
158 elementary and middle school children in China [32]. The Cronbach’s  $\alpha$  coefficient in this  
159 study was 0.932.

160

### 161 **IT**

162           IT level was evaluated using Rotter’s Interpersonal Trust scale which comprises 25  
163 items that include IT in various situations [33]. It can be used to predict an individual’s  
164 estimation of the reliability on other people’s behavioral commitments or statements. Scoring  
165 is based on a scale of 1 to 5; the higher the score, the greater the IT. The Chinese version of the  
166 scale has good reliability and validity [34], and the Cronbach’s  $\alpha$  coefficient in this study was  
167 0.826.

168

### 169 **Self-esteem**

170           The Rosenberg Self-Esteem Scale was used to evaluate adolescents’ overall feelings of  
171 self-worth and acceptance [35]. The 10 items are scored from 1 (completely not compliant) to  
172 4 (completely compliant); the higher the score, the higher the self-esteem. The Chinese version

173 of the scale has good reliability and validity [33], and its Cronbach's  $\alpha$  coefficient was 0.890  
174 in the study.

175

## 176 **IAS**

177 The Multidimensional–Multiattributitional Causality Scale, developed by Lefcourt et al.,  
178 is divided into two subscales: academic achievement and IAS [36]. We used the Chinese  
179 version of the 24-item IAS subscale. The participants rated each item from 0 (completely  
180 disagree) to 4 (completely agree). The scale proposes four possible attributional categories:  
181 ability, effort, situation, and luck. According to the source of each attributional factor, ability  
182 and effort (situation and luck) are classified as internal (external) attribution. The scores for  
183 each dimension are calculated; the higher the score, the more likely the participants are to adopt  
184 the attributional method of the corresponding source. The Cronbach's  $\alpha$  for this subscale was  
185 0.824.

186

## 187 **Research process**

188 After the participants agreed to take part in the study and signed the informed consent,  
189 they would receive an evaluation on depressed mood, IT, self-esteem, and IAS. All of the  
190 questionnaires were self-reported. Participants were guided to the study room and to accomplish  
191 all of the evaluations assisted by the graduate students trained in psychology, which lasted  
192 approximately 1.5 hours. Drug therapy, physical therapy, and other conventional treatments  
193 that the patients received during the study period, as well as the length of their hospital stay,  
194 were not affected by the study. All of the received data were recoded and the information which

195 specify the identity of the participants were covered by new coding. The authors had no access  
196 to information that could identify individual participants after data collection.

197

## 198 **Statistical methods**

199 Descriptive analysis was used to examine the patients' general demographic data,  
200 which involved calculating the frequencies, means, and standard deviations of the variables.  
201 Additionally, the independent samples *t*-test, analysis of variance (ANOVA), and Pearson's  
202 and Spearman's correlation analyses were used to examine the impact of demographic  
203 variables on depressed mood. Next, descriptive analysis, the independent samples *t*-test, and  
204 ANOVA were used to analyze patients' depressed mood, IT, self-esteem, and IAS. Pearson's  
205 correlation analysis was also used to examine the relationship of depressed mood with IT, self-  
206 esteem, and the IAS.

207 The various statistical analyses were two-tailed tests and were performed using SPSS  
208 25.0 (IBM Corp., Armonk, NY, USA). SPSS AMOS 24.0 ( IBM Corp., Armonk, NY, USA)  
209 was used to test the relationship model for the effects of IT, self-esteem, and IAS on depressed  
210 mood. The maximum likelihood method was used to check the fit the model, and the fitting  
211 indicators included  $\chi^2$ , degree of freedom (*df*), normed fit index (NFI), Tucker–Lewis index  
212 (TLI), goodness-of-fit index (GFI), comparative fit index (CFI), adjusted goodness-of-fit index  
213 (AGFI), root mean square error of approximation (RMSEA), and root mean square residual  
214 (RMR). The significance level for all statistical analyses was set to 0.05.

215

## 216 **Results**

## 217 **Impact of demographic variables on depressed mood**

218 The participants' scores for depressed mood were subjected to an independent samples  
219 *t*-test or ANOVA under various categories of demographic variables (e.g., place of residence,  
220 being the only child, parents' occupation and educational level, and annual household income).  
221 The results were not significant ( $p>0.05$ ; Table 2).

222

223 **Table 2. ANOVA Results for Depressed Mood Based on Demographic Variables.**

|                            | <i>F</i> or <i>t</i> value | <i>P</i> value |
|----------------------------|----------------------------|----------------|
| Place of residence         | 0.70                       | 0.496          |
| Being the only child       | 1.46                       | 0.146          |
| Father's occupation        | 0.66                       | 0.654          |
| Father's educational level | 0.08                       | 0.989          |
| Mother's occupation        | 0.75                       | 0.589          |
| Mother's educational level | 0.57                       | 0.685          |
| Annual household income    | 0.39                       | 0.757          |
| Academic performance       | 1.44                       | 0.225          |

224

225 The results of the correlation analysis (Table 3) for age, grade of study, duration of  
226 disease, number of hospitalizations, and depressed mood revealed a negative correlation  
227 between age, grade of study, and depressed mood, which indicated that the older the  
228 participants and the higher their grade of study, the less often they experienced depressed mood.  
229 The number of hospitalizations and depressed mood were significantly and positively  
230 correlated; the greater the number of hospitalizations, the more severe was the depressed mood.

231

232 **Table 3. Results of Correlation Analysis Between the Demographic Variables and**  
233 **Depressed Mood.**

|                            | <i>r</i> value | <i>P</i> value |
|----------------------------|----------------|----------------|
| Age                        | -0.24          | 0.002          |
| Grade of study             | -0.23          | 0.003          |
| Duration of disease        | -0.01          | 0.953          |
| Number of hospitalizations | 0.17           | 0.031          |

234

235 **Descriptive outcomes of depressed mood, IT, self-esteem, and IAS**

236 Table 4 presents the descriptive outcomes of the patients' depressed mood, IT, self-  
237 esteem and IAS. The scores for depressed mood exceeded the threshold by 19 points, indicating  
238 an obvious depressed mood. The scores for IT were lower than the median score of 75 points.  
239 Patients' external attribution (EA) tendencies were also more prominent. Significant  
240 differences were found in IAS scores across the four attributional categories: ability  
241 (2.42±0.71), effort (2.34±0.66), situation (2.79±0.59), and luck (2.27±0.66),  $F=20.818$ ,  
242  $p=0.000$ . The post hoc test indicated that the scores for the EA category of situation were the  
243 highest and significantly higher than those for luck, the other EA category, and the two internal  
244 attribution (IA) categories, ability and effort ( $p=0.000$ ). Attribution to luck scored the lowest  
245 and was significantly lower than attribution to ability and the situation ( $p=0.035$ ,  $p=0.00$ ,  
246 respectively), although the difference in attribution to effort was not significant ( $p=0.350$ ).

247 There were no significant differences between the scores for the two IA categories of ability  
248 and effort ( $p=0.240$ ).

249

250 **Table 4. Descriptive Outcomes of Depressed Mood, IT, Self-Esteem, and IAS.**

|                | <i>Average±SD</i> | <i>t</i> | <i>p</i> |
|----------------|-------------------|----------|----------|
| Depressed mood | 26.78±11.71       |          |          |
| IT             | 67.13±13.06       |          |          |
| Self-esteem    | 23.17±6.54        |          |          |
| IAS            |                   |          |          |
| IA             | 2.38±0.61         | -3.70    | 0.000    |
| EA             | 2.53±0.54         |          |          |

251 Note: SD=standard deviation.

252

### 253 **Correlations between IT, self-esteem, IAS, and depressed mood**

254 The correlations between IT, self-esteem, IA and EA, and depressed mood are shown  
255 in Table 5. Being in a depressed mood was negatively correlated with IT and self-esteem; the  
256 greater the IT, the higher the self-esteem and the lower the frequency of depressed mood.  
257 However, depressed mood was positively correlated with IA and EA; the higher the IA and EA  
258 scores, the more obvious the depressed mood.

259

260 **Table 5. Correlations Between IT, Self-Esteem, IAS, and Depressed Mood.**

|                | <b>Depressed mood</b> | <b>IT</b> | <b>Self-esteem</b> | <b>IA</b> | <b>EA</b> |
|----------------|-----------------------|-----------|--------------------|-----------|-----------|
| Depressed mood | 1                     | -0.30**   | -0.71**            | 0.32**    | 0.38**    |
| IT             |                       | 1         | 0.31**             | -0.20**   | -0.19*    |
| Self-esteem    |                       |           | 1                  | -0.30**   | -0.33**   |
| IA             |                       |           |                    | 1         | 0.59**    |
| EA             |                       |           |                    |           | 1         |

261 Note: \* $p < 0.05$ ; \*\* $p < 0.01$ .

262

263 There was a significant positive correlation between IT and self-esteem; the greater the  
 264 IT, the higher the self-esteem. IT was significantly negatively correlated with IA and EA; the  
 265 greater the IT, the lower the IA and EA scores. Self-esteem was significantly negatively  
 266 correlated with IA and EA; the higher the self-esteem, the lower the IA and EA scores. A  
 267 significant positive correlation was observed between IA and EA.

268

269 **Structural variance model for IT, self-esteem, IAS, and depressed**  
 270 **mood**

271 A theoretical model of the relationships between IT, self-esteem, IAS, and depressed  
 272 mood was constructed based on existing research. The model was established after fitting  
 273 existing data ( $\chi^2=0.63$ ,  $df=2$ ,  $p=0.729$ ). Table 6 presents the overall model fit indicators. The  
 274 values of  $\chi^2/df$ , NFI, TLI, CFI, GFI, and AGFI were above 0.95; RMSEA was less than 0.05,  
 275 and RMR was 0.055.

276



277 **Table 6. Overall Model Fit Indicators.**

| Fit indicators     | $\chi^2/df$ | NFI         | TLI         | CFI         | GFI         | AGFI        | RMSEA       | RMR         |
|--------------------|-------------|-------------|-------------|-------------|-------------|-------------|-------------|-------------|
| Standard deviation | <2          | $\geq 0.95$ | $\geq 0.95$ | $\geq 0.95$ | $\geq 0.95$ | $\geq 0.95$ | $\leq 0.05$ | $\leq 0.05$ |
| Numerical value    | 0.316       | 0.997       | 1.03        | 1.000       | 0.998       | 0.989       | 0.000       | 0.055       |

278

279 Hu and Bentler stated that the model fit is good when  $\chi^2/df$  is 0–2; the values of NFI,  
 280 TLI, GFI, AGFI, and CFI are above 0.95; and those of RMSEA and RMR are not higher than  
 281 0.05 [37]. The model is acceptable when  $\chi^2/df$  is 2–5; the values of NFI, TLI, GFI, AGFI, and  
 282 CFI are above 0.9; and those of RMSEA and RMR are less than 0.1. All data in this study met  
 283 the statistical requirements, indicating good overall model fit.

284 The path coefficient analysis revealed that the path coefficients reached statistically  
 285 significant levels ( $p < 0.05$ ), except for those from IT to depressed mood. The details of the  
 286 relevant path coefficients and diagram of the model are presented in Table 7 and Fig 1,  
 287 respectively.

288

289 **Fig 1.** Model for the impact of IT, self-esteem, and IAS on depressed mood

290 Note: IA: internal attribution; EA: external attribution; IAS: interpersonal attributional style;  
 291 IT: interpersonal trust; e1-e6: error.

292

293 **Table 7. Significance Test for the Path Coefficients.**

| Path        |   | Standard regression coefficient ( $\beta$ ) | SE    | CR    | P      |       |
|-------------|---|---------------------------------------------|-------|-------|--------|-------|
| IAS         | → | Self-esteem                                 | -0.35 | 0.112 | -3.850 | 0.000 |
|             |   | Depressed mood                              | 0.20  | 0.160 | 2.727  | 0.006 |
|             |   | IA                                          | 0.72  |       |        |       |
|             |   | EA                                          | 0.81  | 0.190 | 5.227  | 0.000 |
| IT          | → | IAS                                         | -0.25 | 0.038 | -2.670 | 0.008 |
|             |   | Self-esteem                                 | 0.23  | 0.037 | 3.052  | 0.002 |
|             |   | Depressed mood                              | -0.06 | 0.051 | -1.041 | 0.298 |
| Self-esteem | → | Depressed mood                              | -0.61 | 0.112 | -9.688 | 0.000 |

294

295 IT affected depressed mood through three paths (Fig 1). The first was through self-  
 296 esteem, which had a complete mediating effect in the relationship between IT and depressed  
 297 mood. The second was through the complete mediating effect of IAS. The dual mediating  
 298 effects of IAS and self-esteem formed the third path.

299 IAS could affect depressed mood on its own or through the partial mediating effect of  
 300 SE. As an important mediating variable in this model, self-esteem not only affected the

301 relationship between IT and depressed mood but also moderated the effect of IAS on depressed  
302 mood.

303

## 304 **Discussion**

305 In this study, depressed mood, IT, self-esteem, and IAS of 166 hospitalized FADs were  
306 investigated and analyzed. The results showed that the patients had obvious depression when  
307 they were enrolled in the study, and their IT and self-esteem scores were average. For IAS,  
308 participants were more inclined toward the EA category. IT, self-esteem, and IAS (IA and EA)  
309 were significantly correlated with depressed mood. In the relationship model for the four  
310 variables, the relationship between IT and depressed mood was affected by two factors: SE and  
311 IAS. IT required the mediating effect of self-esteem or IAS to affect depressed mood. Although  
312 IAS could directly affect depressed mood, its effect was partially mediated by the introduction  
313 of self-esteem. As an important mediating variable, self-esteem not only moderated the effects  
314 of IT and IAS on depressed mood but also produced the most important predictive effect on  
315 depressed mood for the entire pathway.

316 There is no consistent conclusion regarding the effect of IT on adolescent depression.  
317 Adolescents with good IT fared better than those with poor IT in expanding their social  
318 networks, gaining high-quality peer relationships and high social status, and reducing  
319 loneliness [20]. However, this impact may be unstable [22,23,38]. Further, there may be other  
320 factors that exert mediating or moderating effects in the relationship between IT and depressed  
321 mood [20,39,40]. McCarthy et al. proposed that the personality traits of self-esteem and  
322 agreeableness could predict IT and the revelation of negative emotions [41]. Through diary

323 studies, Li et al. established that self-esteem modulates the correlation between self-exposure  
324 and IT when forming offline friendships [42]. From their study of the relationship between  
325 social avoidance and depressed mood in 1,021 college students, Yuan et al. concluded that IT  
326 mediated the correlation between social avoidance and depressed mood, whereas self-esteem  
327 moderated the effect of social avoidance on IT [43].

328         The aforementioned studies focused on college students. By contrast, we surveyed  
329 hospitalized FADs, and the results indicated that self-esteem and IAS affected the correlation  
330 between IT and depressed mood. When negative events continued to occur in the FADs'  
331 relationships and their IT was destroyed, their self-esteem and IAS determined whether they  
332 would experience depressed mood. The lower the self-esteem, the more obvious the application  
333 of EA, and the more likely the appearance of depressed mood. However, high self-esteem and  
334 flexible IAS can moderate the negative emotional effects caused by adverse interpersonal  
335 events and damaged IT.

336         There has been extensive research and consensus on the relationship between IAS and  
337 depressed mood [44]. Our findings indicated that IAS was significantly positively correlated  
338 with depressed mood in hospitalized FADs but significantly negatively correlated with self-  
339 esteem and IT. Self-esteem also mediated the effect of IAS on depressed mood. The patients  
340 who participated in this study were more inclined to develop EA in their IAS. Attributing  
341 interpersonal events to situations is externally controlled and more difficult for individuals to  
342 control with their will [24]. Individuals who do so are more likely to feel frustrated and lost  
343 during their interpersonal interactions. This conclusion supports the hopelessness/self-esteem  
344 model for depression. This model, proposed by Metalsky et al., integrates the susceptibility

345 model of depression and self-esteem theory and proposes that negative attributional methods  
346 generate hopelessness and depressed mood through low self-esteem and failures. By contrast,  
347 high self-esteem plays a buffering role in the process of attribution failures that cause the  
348 development of depression [30].

349         The effect of self-esteem on adolescents' emotional problems has been supported  
350 [25,26]. Adolescents with low self-esteem report more emotional and behavioral issues such  
351 as suicidal ideation, self-injury, depression, and anxiety [45]. The susceptibility model of  
352 depression posits that self-esteem is an important risk factor for the development of depression  
353 [25]. This model is supported by our findings: self-esteem was the most significant factor that  
354 affected depressed mood and could mediate the effects of IT and IAS on depressed mood. This  
355 is also in line with the characteristics of psychological development during adolescence.  
356 Adolescents pay more attention to their self-image and wish to portray a consistent image.  
357 Positive and stable self-evaluation determines an individual's emotional responses when facing  
358 adverse life events. This is beneficial because individuals are protected and can stably weather  
359 the turbulent adolescent period. They can also complete the successful establishment of their  
360 self-identity and transition into healthy adulthood [14].

361         Additionally, we found that the grade of study, age, and number of hospitalizations  
362 affected the severity of depressed mood. The older the patient, the higher the grade, and the  
363 fewer the hospitalizations, the less often they experienced depressed mood; the younger the  
364 patient, the lower the grade, and the more the hospitalizations, the more frequent the depressed  
365 mood. This may be related to the extent of physical, cognitive, and social development in  
366 female adolescents. In females, the physiological changes associated with puberty generally

367 begin and end around the age of 10 and 14 years, respectively. During this stage, imbalances  
368 in physical and psychological development are more obvious, and emotional fluctuations are  
369 more prominent. The incomplete development of cognitive functions is a limitation, and self-  
370 identity is yet to be established. Explosive expressions of female emotions occur more  
371 frequently during early adolescence. Parents easily perceive such obvious changes and become  
372 more concerned about the situation [5,14].

373         This study explored the sociocognitive factors affecting FADs and found that self-  
374 esteem is an important variable that regulates or mediates the relationships of IT and IAS with  
375 depressed mood. Based on our findings, the following are some novel suggestions for the  
376 psychological treatment of FADs. First, early intervention for FADs is critical, and the number  
377 of hospitalizations can be effectively reduced with early treatment, thereby alleviating the  
378 severity of their depressed mood and helping them navigate through adolescence more  
379 smoothly. Second, interpersonal relationships are an important theme in adolescents'  
380 development and are related to their mental health status. The key to helping FADs rebuild  
381 trust in interpersonal communication and reduce depression during interpersonal  
382 psychotherapy is improving their self-esteem and reducing their tendency for EA in  
383 interpersonal relationships. This can, in turn, facilitate the establishment of trust in  
384 interpersonal communication, which leads to the development of high-quality interpersonal  
385 relationships, thereby allowing them to gain additional social support.

386         This study also has some limitations. First, it is a pilot study, and representative samples  
387 are still needed for further verification of the results. Second, as IT, self-esteem, and IAS are  
388 multidimensional concepts, the questionnaire adopted in this study cannot offer a

389 comprehensive perspective. Moreover, the use of self-report questionnaires lead to a lack of  
390 ecological validity. The causal relationship between these real behavioral outcomes and the  
391 emergence of depression warrants further research and exploration.

392

## 393 **References**

- 394 [1] Polanczyk GV, Salum GA, Sugaya LS, Caye A, Rohde LA. Annual research review: a  
395 meta-analysis of the worldwide prevalence of mental disorders in children and  
396 adolescents. *J Child Psychol Psychiatry*. 2015;56(3): 345-365. doi: 10.1111/jcpp.12381.
- 397 [2] Abel KM, Hope H, Swift E, Parisi R, Ashcroft DM, Kosidou K, et al. Prevalence of  
398 maternal mental illness among children and adolescents in the UK between 2005 and  
399 2017: a national retrospective cohort analysis. *Lancet Public Health*. 2019;4(6): e291-  
400 300. doi: 10.1016/S2468-2667(19)30059-3
- 401 [3] Avenevoli S, Swendsen J, He JP, Burstein M, Merikangas KR. Major depression in the  
402 national comorbidity survey–adolescent supplement: prevalence, correlates, and  
403 treatment. *J Am Acad Child Adolesc Psychiatry*. 2015;54(1): 37-44.e2. doi:  
404 10.1016/j.jaac.2014.10.010
- 405 [4] Li F, Cui Y, Li Y, Guo L, Ke X, Liu J, et al. Prevalence of mental disorders in school  
406 children and adolescents in China: diagnostic data from detailed clinical assessments of  
407 17,524 individuals. *J Child Psychol Psychiatry*. 2022;63(1): 34-46. doi:  
408 10.1111/jcpp.13445
- 409 [5] Fu XL, Zhang K, Chen X, Chen Z. Report on national mental health development in  
410 China (2019–2020). Beijing: Social Sciences Academic Press; 2021.

- 411 [6] Thapar A, Collishaw S, Pine DS, Thapar AK. Depression in adolescence. *Lancet*.  
412 2012;379(9820): 1056-1067. doi: 10.1016/S0140-6736(11)60871-4
- 413 [7] Mokdad AH, Forouzanfar MH, Daoud F, Mokdad AA, El Bcheraoui C, Moradi-Lakeh  
414 M, et al. Global burden of diseases, injuries, and risk factors for young people's health  
415 during 1990–2013: a systematic analysis for the Global Burden of Disease Study 2013.  
416 *Lancet*. 2016;387(10036): 2383-2401. doi: 10.1016/S0140-6736(16)00648-6
- 417 [8] Hammen C. Adolescent depression: stressful interpersonal contexts and risk for  
418 recurrence. *Curr Dir Psychol Sci*. 2009;18(4): 200-204. doi: 10.1111/j.1467-  
419 8721.2009.01636.x
- 420 [9] Gariépy G, Honkaniemi H, Quesnel-Vallée A. Social support and protection from  
421 depression: systematic review of current findings in western countries. *Br J Psychiatry*.  
422 2016;209(4): 284-293. doi: 10.1192/bjp.bp.115.169094
- 423 [10] Badcock PB, Davey CG, Whittle S, Allen NB, Friston KJ. The depressed brain: an  
424 evolutionary systems theory. *Trends Cogn Sci*. 2017;21(3): 182-194. doi:  
425 10.1016/j.tics.2017.01.005
- 426 [11] Filia K, Eastwood O, Herniman S, Badcock P. Facilitating improvements in young  
427 people's social relationships to prevent or treat depression: a review of empirically  
428 supported interventions. *Transl Psychiatry*. 2021;11(1): 305. doi: 10.1038/s41398-021-  
429 01406-7
- 430 [12] van Harmelen AL, Gibson JL, St Clair MC, Owens M, Brodbeck J, Dunn V, et al.  
431 Friendships and family support reduce subsequent depressive symptoms in at-risk  
432 adolescents. *PLoS One*. 2016;11(5): e0153715. doi: 10.1371/journal.pone.0153715



- 433 [13] Wang MT, Brinkworth MB, Eccles J. Moderating effects of teacher–student relationship  
434 in adolescent trajectories of emotional and behavioral adjustment. *Dev Psychol.* 2013;  
435 49(4): 690-705. doi: 10.1037/a0027916
- 436 [14] Berk LK. *Development through the lifespan*. 4th ed. Beijing: China Renmin University  
437 Press; 2013.
- 438 [15] Rotter JB. A new scale for the measurement of interpersonal trust. *J Pers.* 1967;35(4):  
439 651-665. doi: 10.1111/j.1467-6494.1967.tb01454.x
- 440 [16] Rotenberg KJ. *Interpersonal trust during childhood and adolescence*. New York:  
441 Cambridge University Press; 2010.
- 442 [17] Knack S, Keefer P. Does social capital have an economic payoff? A cross-country  
443 investigation. *Q J Econ.* 1997;112(4): 1251-1288. doi: 10.1162/003355300555475
- 444 [18] Gurtman MB. Trust, distrust, and interpersonal problems: a circumplex analysis. *J Pers*  
445 *Soc Psychol.* 1992;62(6): 989-1002. doi: 10.1037/0022-3514.62.6.989
- 446 [19] Simpson JA. Foundations of interpersonal trust. In: Van Lange PAM, editor. *Social*  
447 *psychology: handbook of basic principles*. 2nd ed. New York: Guilford Press; 2007. pp.  
448 587-607.
- 449 [20] Li C, Liu D, Dong Y. Self-esteem and problematic smartphone use among adolescents:  
450 a moderated mediation model of depression and interpersonal trust. *Front Psychol.*  
451 2019;10: 2872. doi: 10.3389/fpsyg.2019.02872
- 452 [21] Mellick W, Sharp C, Ernst M. Depressive adolescent girls exhibit atypical social  
453 decision-making in an iterative trust game. *J Soc Clin Psychol.* 2019;38(3): 224-244. doi:  
454 10.1521/jscp.2019.38.3.224

- 455 [22] Wartberg L, Kriston L, Thomasius R. Depressive symptoms in adolescents. *Dtsch*  
456 *Arztebl Int.* 2018;115(33-34): 549-555. doi: 10.3238/arztebl.2018.0549
- 457 [23] Kim SS, Chung Y, Perry MJ, Kawachi I, Subramanian SV. Association between  
458 interpersonal trust, reciprocity, and depression in South Korea: a prospective analysis.  
459 *PLoS One.* 2012;7(1): e30602. doi: 10.1371/journal.pone.0030602
- 460 [24] Pei W, Wen H. *Social cognition psychology.* Beijing: Beijing Normal University Press;  
461 2015.
- 462 [25] Orth U, Robins RW. Understanding the link between low self-esteem and depression.  
463 *Curr Dir Psychol Sci.* 2013;22(6): 455-460. doi: 10.1177/0963721413492763
- 464 [26] Gittins CB, Hunt C. Self-criticism and self-esteem in early adolescence: do they predict  
465 depression? *PLoS One.* 2020;15(12): e0244182. doi: 10.1371/journal.pone.0244182
- 466 [27] Abramson LY, Seligman MEP, Teasdale JD. Learned helplessness in humans: critique  
467 and reformulation. *J Abnorm Psychol.* 1978;87(1): 49-74. doi: 10.1037/0021-  
468 843X.87.1.49
- 469 [28] Lakdawalla Z, Hankin BL, Mermelstein R. Cognitive theories of depression in children  
470 and adolescents: a conceptual and quantitative review. *Clin Child Fam Psychol Rev.*  
471 2007;10(1): 1-24. doi: 10.1007/s10567-006-0013-1
- 472 [29] Hu JM, Ai HS. Self-esteem mediates the effect of the parent-adolescent relationship on  
473 depression. *J Health Psychol.* 2016;21(6): 897-904. doi: 10.1177/1359105314541315
- 474 [30] Metalsky GI, Joiner TE, Hardin TS, Abramson LY. Depressive reactions to failure in a  
475 naturalistic setting: a test of the hopelessness and self-esteem theories of depression. *J*  
476 *Abnorm Psychol.* 1993;102(1): 101-109. doi: 10.1037/0021-843x.102.1.101

- 477 [31] Southall D, Roberts JE. Attributional style and self-esteem in vulnerability to adolescent  
478 depressive symptoms following life stress: a 14-week prospective study. *Cognit Ther Res.*  
479 2002;26: 563-579. doi: 10.1023/A:1020457508320
- 480 [32] Sun SY, Wang SS. The Children's Depression Inventory in worldwide child  
481 development research: a reliability generalization study. *J Child Fam Stud.* 2015;24(8):  
482 2352-2363. doi: 10.1007/s10826-014-0038-x
- 483 [33] Rotter JB. A new scale for the measurement of interpersonal trust. *J Pers.* 1967;35: 651-  
484 665. doi: 10.1111/j.1467-6494.1967.tb01454.x
- 485 [34] Wang XD, Wang XL, Ma H. Manual of mental health rating scale. *Chinese Mental*  
486 *Health Journal.* 1999; 113-115
- 487 [35] Rosenberg M. *Society and the adolescent self-image.* Princeton, NJ: Princeton University  
488 Press; 1965.
- 489 [36] Lefcourt HM, von Baeyer CL, Ware EE, Cox DJ. The Multidimensional-  
490 Multiattributional Causality Scale: the development of a goal specific locus of control  
491 scale. *Can J Behav Sci.* 1979;11: 286-304. doi: 10.1037/h0081598
- 492 [37] Hu L, Bentler PM. Cutoff criteria for fit indexes in covariance structure analysis:  
493 conventional criteria versus new alternatives. *Struct Equ Model.* 1999;6(1): 1-55. doi:  
494 10.1080/10705519909540118
- 495 [38] Rotenberg KJ, McDougall P, Boulton MJ, Vaillancourt T, Fox C, Hymel S. Cross-  
496 sectional and longitudinal relations among peer-reported trustworthiness, social  
497 relationships, and psychological adjustment in children and early adolescents from the

- 498 United Kingdom and Canada. *J Exp Child Psychol.* 2004;88(1): 46-67. doi:  
499 10.1016/j.jecp.2004.01.005
- 500 [39] Kong FC, Zhou ZK. The correlation between attributional style and interpersonal trust  
501 of adolescents. *China J Health Psychol.* 2008;16(12): 1371-1372.
- 502 [40] Baumeister RF. Does high self-esteem cause better performance, interpersonal success,  
503 happiness, or healthier lifestyles? *Psychol Sci Public Interest.* 2003;4(1): 1-44. doi:  
504 10.1111/1529-1006.01431
- 505 [41] McCarthy MH, Wood JV, Holmes JG. Dispositional pathways to trust: self-esteem and  
506 agreeableness interact to predict trust and negative emotional disclosure. *J Pers Soc*  
507 *Psychol.* 2017;113(1): 95-116. doi: 10.1037/pspi0000093
- 508 [42] Li LMW, Chen QL, Gao HJ, Li WQ, Ito K. Online/offline self-disclosure to offline  
509 friends and relational outcomes in a diary study: the moderating role of self-esteem and  
510 relational closeness. *Int J Psychol.* 2021;56(1): 129-137. doi: 10.1002/ijop.12684
- 511 [43] Yuan Y, Jiang SH, Wen X, Han Z, Wu D, Wang X, et al. The chain-mediation pathway  
512 of social avoidance to depression in college students is regulated by self-esteem. *Front*  
513 *Psychol.* 2022;13: 802161. doi: 10.3389/fpsyg.2022.802161
- 514 [44] Jacobs RH, Reinecke MA, Gollan JK, Kane P. Empirical evidence of cognitive  
515 vulnerability for depression among children and adolescents: a cognitive science and  
516 developmental perspective. *Clin Psychol Rev.* 2008;28(5): 759-782. doi:  
517 10.1016/j.cpr.2007.10.006

518 [45] Ngo H, VanderLaan DP, Aitken M. Self-esteem, symptom severity, and treatment  
519 response in adolescents with internalizing problems. *J Affect Disord.* 2020;273: 183-191.  
520 doi: 10.1016/j.jad.2020.04.045  
521

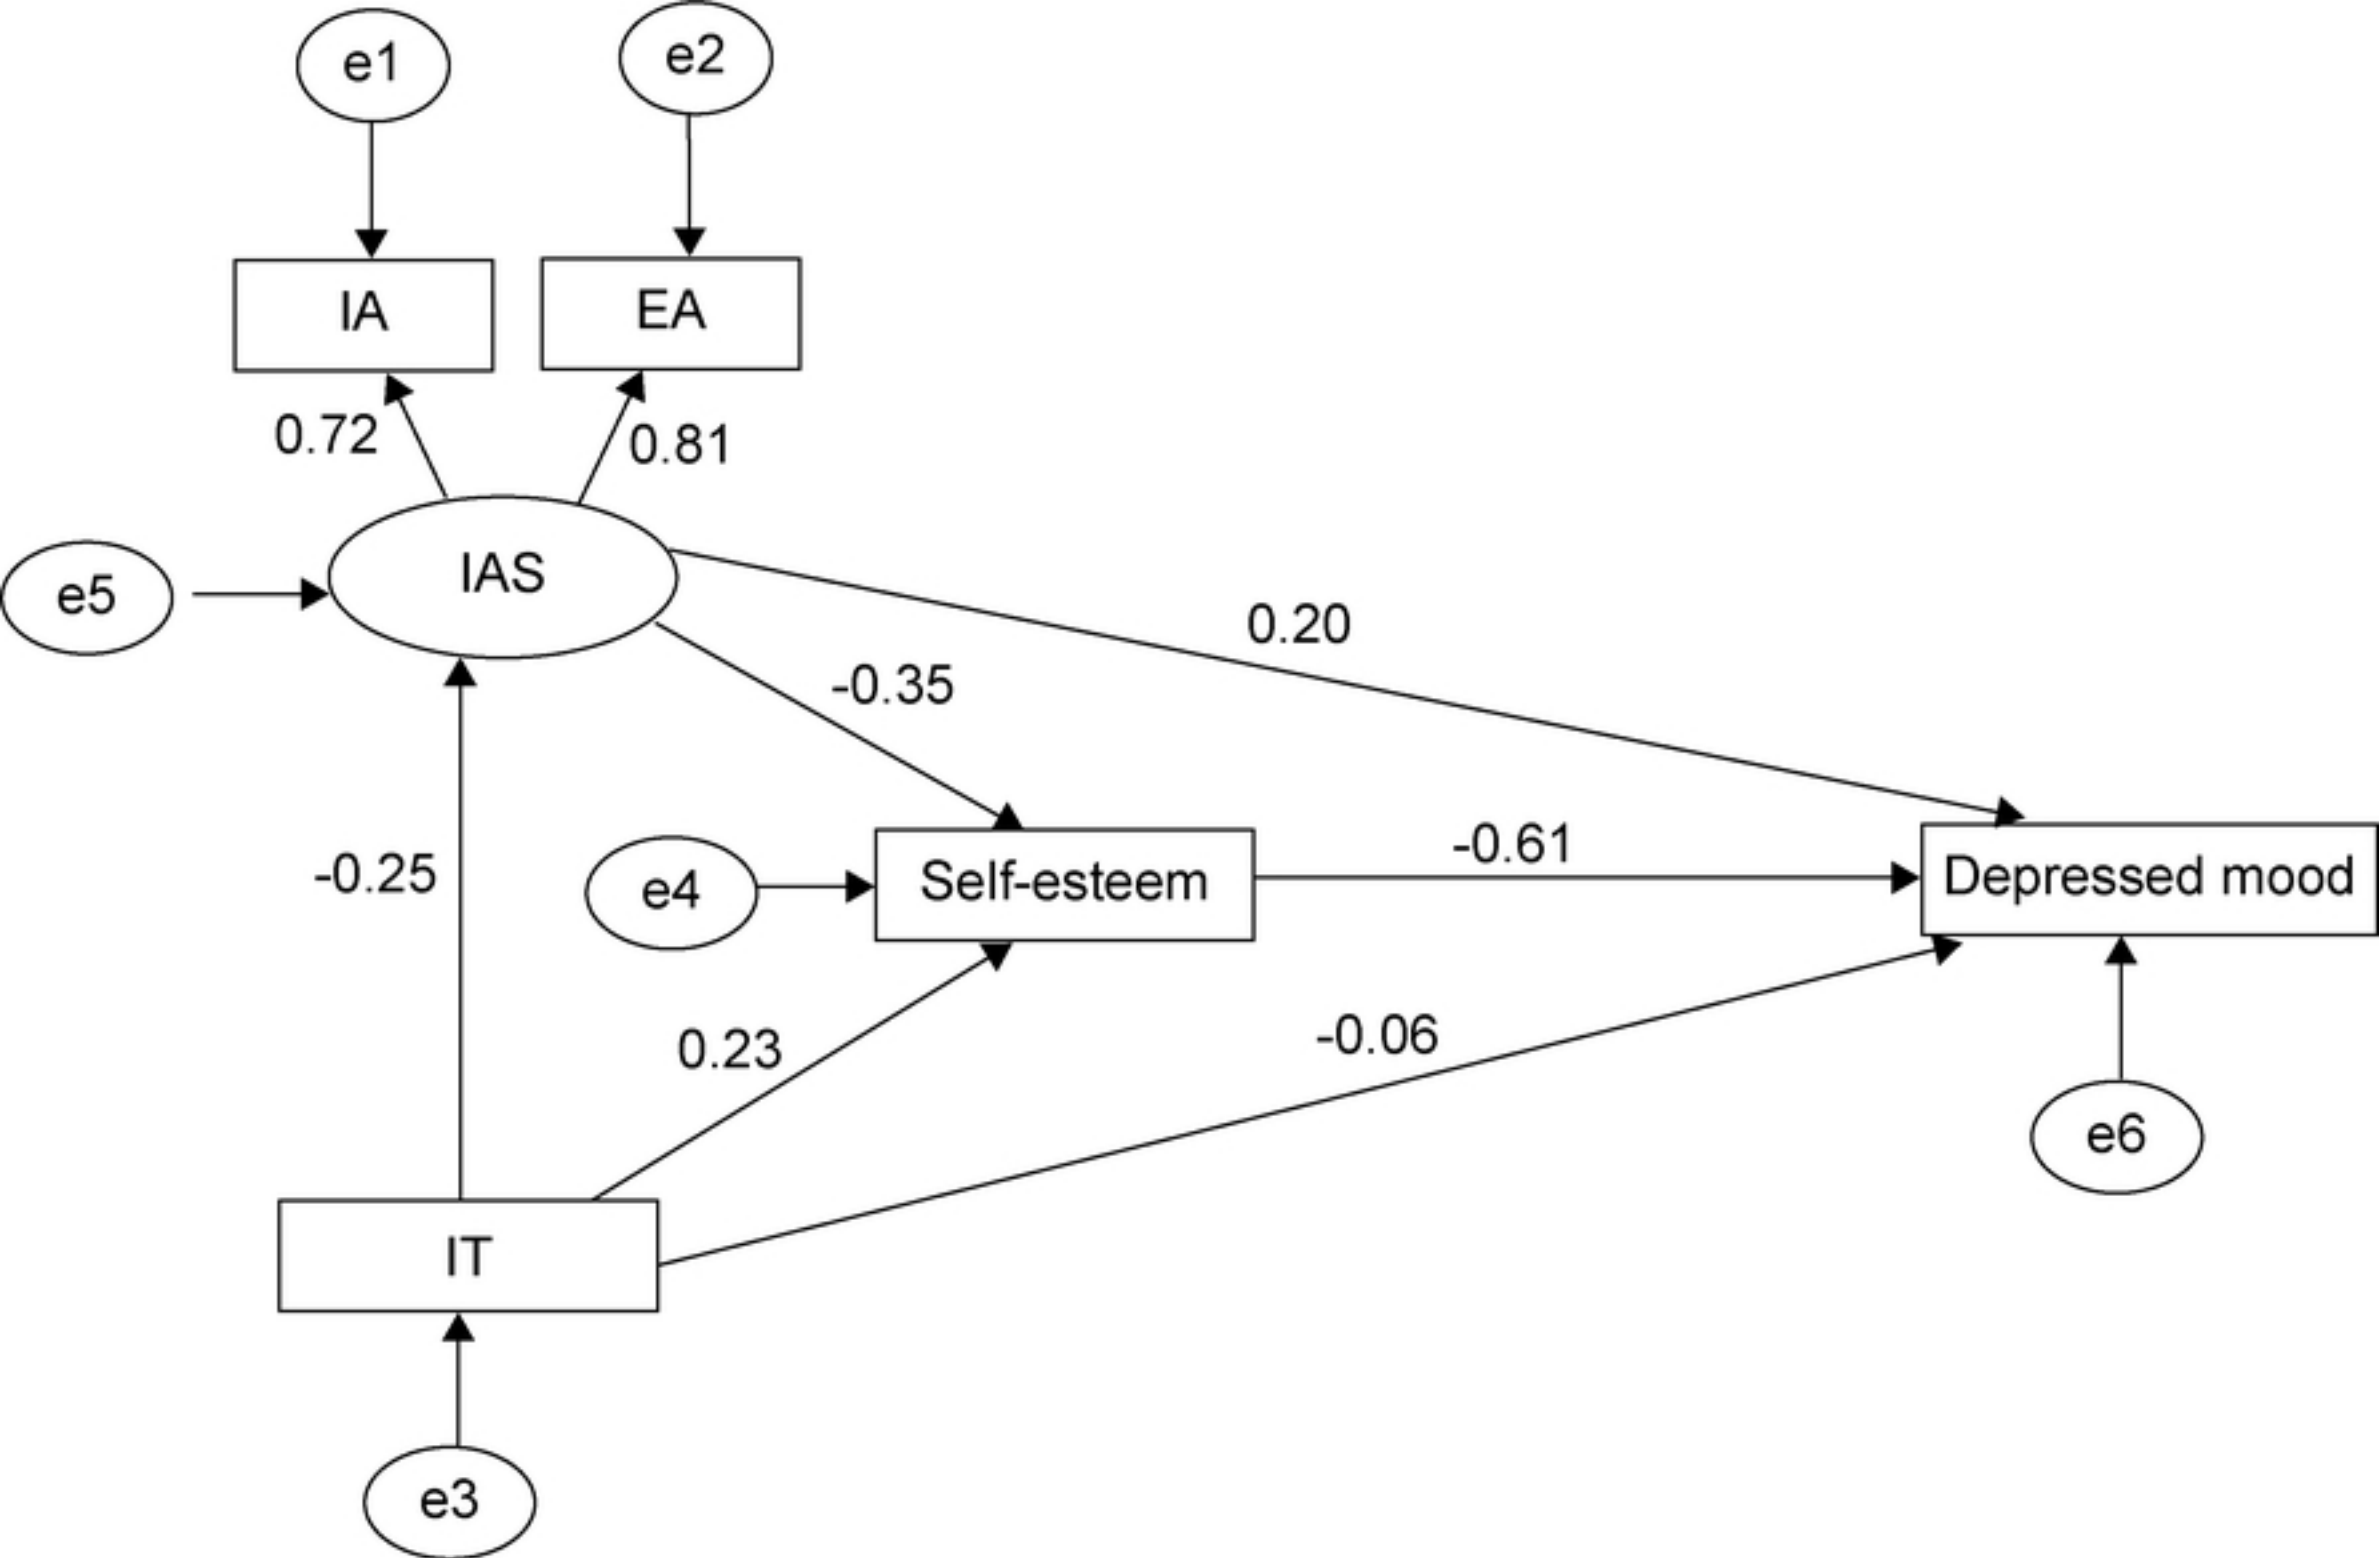

Figure 1
